# Supplementary material for: Intelligent rubber with tailored properties for self-healing and shape memory
Source: Royal Society of Chemistry journal article supplement (doi:10.1039/c5ta01915j), 2015-01-01
Supplement: c5ta01915j2.pdf [file c5ta01915j2.pdf]

**Electronic Supplementary Information (ESI)**

**Intelligent Rubber with Tailored Properties for Self-healing and Shape Memory**

Dong Wang,<sup>ab</sup> Jing Guo,<sup>ab</sup> Huan Zhang,<sup>ab</sup> Beichen Cheng,<sup>a</sup> Heng Shen<sup>ab</sup> Ning Zhao<sup>\*a</sup> and Jian Xu<sup>\*a</sup>

*<sup>a</sup>Beijing National Laboratory for Molecular Sciences, Institute of Chemistry, Chinese Academy of Sciences, Beijing, 100190, China. E-mail: [zhaoning@iccas.ac.cn](mailto:zhaoning@iccas.ac.cn); [jxu@iccas.ac.cn](mailto:jxu@iccas.ac.cn)*

*<sup>b</sup>University of Chinese Academy of Sciences, Beijing 100049, China*

**Movie S1.** Shape-memory behavior of SPB-6% film. In the movie, a permanent spiral-like SPB-6% film was first deformed under heating at 60 °C, and was cooled to fix the temporary flat shape (not shown in the movie). Then the film was immersed in 60 °C hot water and recovered to its original spiral shape within several seconds.

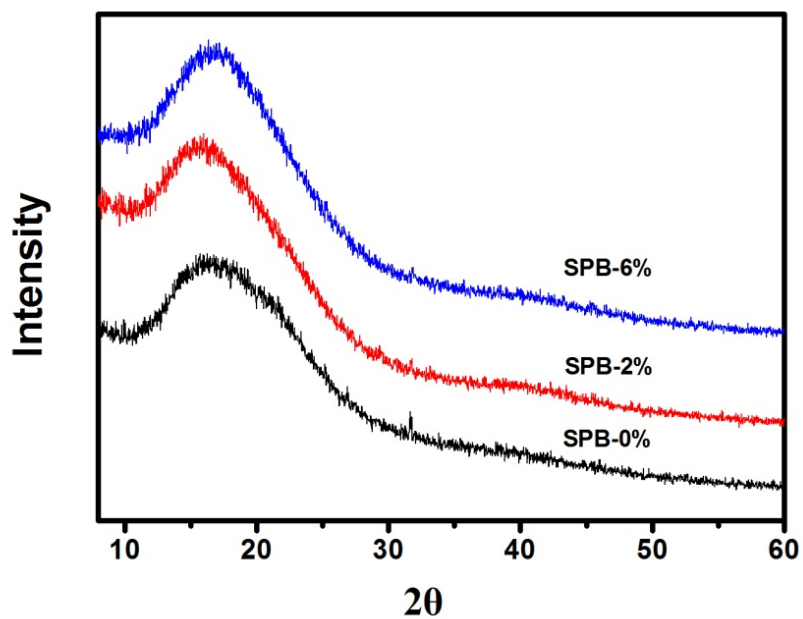

Fig. S1 WAXD patterns of the polymers SPB-0%, SPB-2% and SPB-6%.

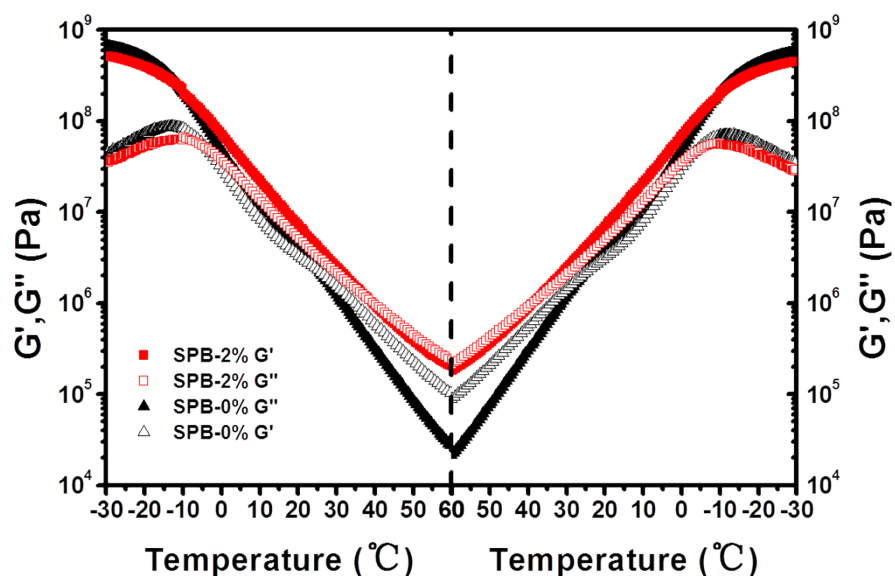

Fig. S2  $G'$  and  $G''$  of SPB-0% and SPB-2% during heating-cooling cycle between -30 and 60 °C, measured at  $\omega = 10$  rad/s,  $\gamma = 0.03$  % from -30 to -10 °C and  $\gamma = 0.1$  % from -10 to 60 °C

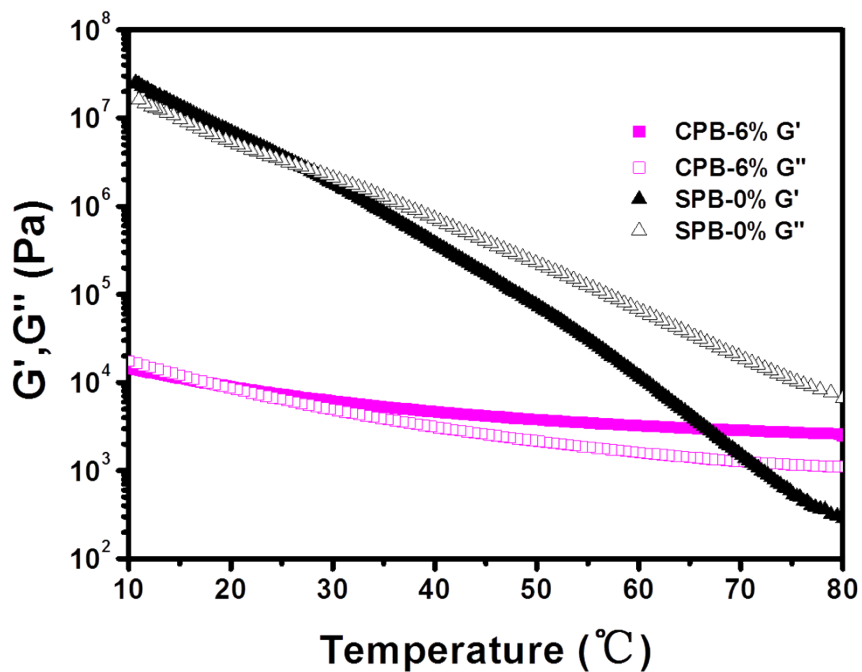

**Fig. S3** Temperature sweep of covalently crosslinked sample CPB-6% and supramolecular polymer SPB-0% between 10 and 80 °C, measured at  $\omega = 10$  rad/s ,  $\gamma = 1\%$  for CPB-6% and 0.1% for SPB-0%.

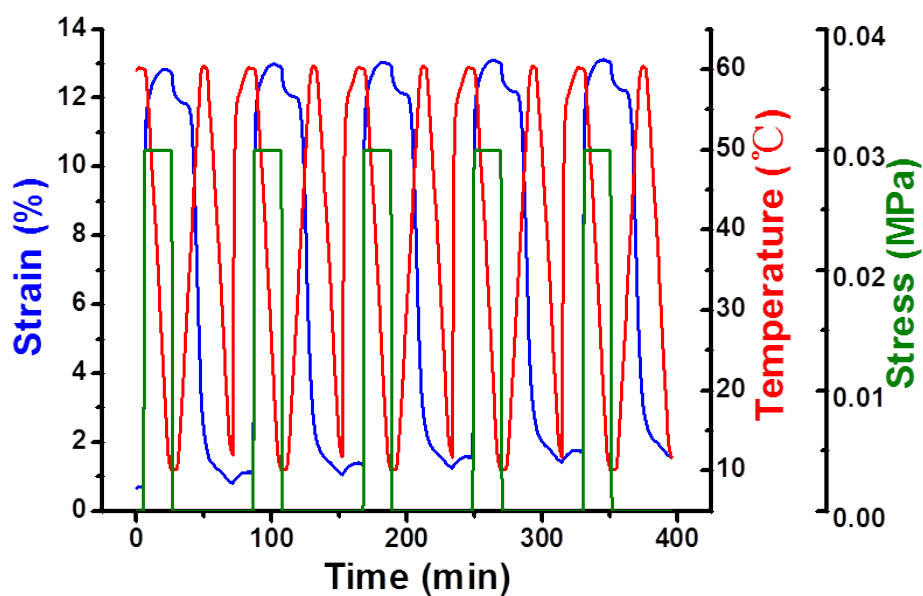

**Fig. S4** Shape memory experiment for SPB-6% in five cycles.

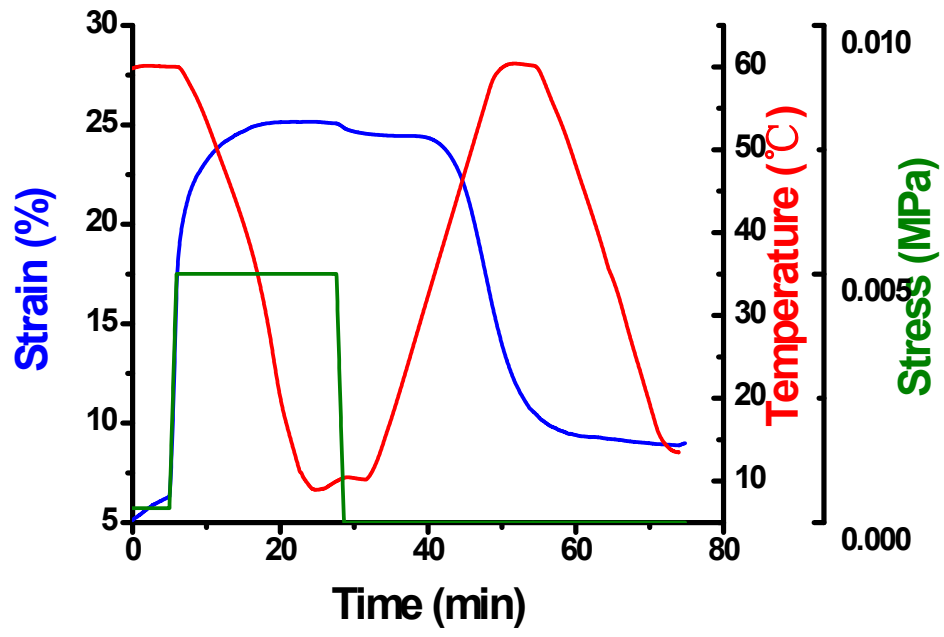

Fig. S5 Typical thermal one-way shape-memory cycle for SPB-2%.
